# Supplementary material for: Redox-responsive molecular helices with highly condensed π-clouds
Source: Springer Nature journal article supplement (doi:10.1038/nchem.900), 2010-11-14
Supplement: 41557_2011_BFnchem900_MOESM3_ESM.mol [file 41557_2011_BFnchem900_MOESM3_ESM.mol]

  ChemDraw10281008102D

 42 45  0  0  0  0  0  0  0  0999 V2000
   -1.7850    2.2667    0.0000 C   0  0  0  0  0  0  0  0  0  0  0  0
   -1.7850    1.4417    0.0000 C   0  0  0  0  0  0  0  0  0  0  0  0
   -1.0705    1.0292    0.0000 C   0  0  0  0  0  0  0  0  0  0  0  0
   -0.3560    1.4417    0.0000 C   0  0  0  0  0  0  0  0  0  0  0  0
   -0.3560    2.2667    0.0000 C   0  0  0  0  0  0  0  0  0  0  0  0
   -1.0705    2.6792    0.0000 C   0  0  0  0  0  0  0  0  0  0  0  0
    0.3560    1.0306    0.0000 C   0  0  0  0  0  0  0  0  0  0  0  0
    0.3560    0.2056    0.0000 C   0  0  0  0  0  0  0  0  0  0  0  0
    1.0705   -0.2069    0.0000 C   0  0  0  0  0  0  0  0  0  0  0  0
    1.7850    0.2056    0.0000 C   0  0  0  0  0  0  0  0  0  0  0  0
    1.7850    1.0306    0.0000 C   0  0  0  0  0  0  0  0  0  0  0  0
    1.0705    1.4431    0.0000 C   0  0  0  0  0  0  0  0  0  0  0  0
    0.3560    2.6778    0.0000 Br  0  0  0  0  0  0  0  0  0  0  0  0
   -1.7850   -0.2056    0.0000 C   0  0  0  0  0  0  0  0  0  0  0  0
   -1.7850   -1.0306    0.0000 C   0  0  0  0  0  0  0  0  0  0  0  0
   -1.0705   -1.4431    0.0000 C   0  0  0  0  0  0  0  0  0  0  0  0
   -0.3560   -1.0306    0.0000 C   0  0  0  0  0  0  0  0  0  0  0  0
   -0.3560   -0.2056    0.0000 C   0  0  0  0  0  0  0  0  0  0  0  0
   -1.0705    0.2069    0.0000 C   0  0  0  0  0  0  0  0  0  0  0  0
    0.3560   -1.4417    0.0000 C   0  0  0  0  0  0  0  0  0  0  0  0
    0.3560   -2.2667    0.0000 C   0  0  0  0  0  0  0  0  0  0  0  0
    1.0705   -2.6792    0.0000 C   0  0  0  0  0  0  0  0  0  0  0  0
    1.7850   -2.2667    0.0000 C   0  0  0  0  0  0  0  0  0  0  0  0
    1.7850   -1.4417    0.0000 C   0  0  0  0  0  0  0  0  0  0  0  0
    1.0705   -1.0292    0.0000 C   0  0  0  0  0  0  0  0  0  0  0  0
   -0.3560   -2.6778    0.0000 Br  0  0  0  0  0  0  0  0  0  0  0  0
   -2.4970    2.6778    0.0000 O   0  0  0  0  0  0  0  0  0  0  0  0
   -3.2091    2.2667    0.0000 C   0  0  0  0  0  0  0  0  0  0  0  0
   -2.4970    1.0306    0.0000 O   0  0  0  0  0  0  0  0  0  0  0  0
   -3.2091    1.4417    0.0000 C   0  0  0  0  0  0  0  0  0  0  0  0
    2.4970    1.4417    0.0000 O   0  0  0  0  0  0  0  0  0  0  0  0
    3.2091    1.0306    0.0000 C   0  0  0  0  0  0  0  0  0  0  0  0
    2.4970   -0.2056    0.0000 O   0  0  0  0  0  0  0  0  0  0  0  0
    3.2091    0.2056    0.0000 C   0  0  0  0  0  0  0  0  0  0  0  0
   -2.4970    0.2056    0.0000 O   0  0  0  0  0  0  0  0  0  0  0  0
   -3.2091   -0.2056    0.0000 C   0  0  0  0  0  0  0  0  0  0  0  0
   -2.4970   -1.4417    0.0000 O   0  0  0  0  0  0  0  0  0  0  0  0
   -3.2091   -1.0306    0.0000 C   0  0  0  0  0  0  0  0  0  0  0  0
    2.4970   -1.0306    0.0000 O   0  0  0  0  0  0  0  0  0  0  0  0
    3.2091   -1.4417    0.0000 C   0  0  0  0  0  0  0  0  0  0  0  0
    2.4970   -2.6778    0.0000 O   0  0  0  0  0  0  0  0  0  0  0  0
    3.2091   -2.2667    0.0000 C   0  0  0  0  0  0  0  0  0  0  0  0
  1  2  2  0      
  2  3  1  0      
  3  4  2  0      
  4  5  1  0      
  5  6  2  0      
  6  1  1  0      
  4  7  1  0      
  7  8  2  0      
  8  9  1  0      
  9 10  2  0      
 10 11  1  0      
 11 12  2  0      
 12  7  1  0      
  5 13  1  0      
  8 18  1  0      
  1 27  1  0      
  2 29  1  0      
 11 31  1  0      
 10 33  1  0      
 14 15  2  0      
 15 16  1  0      
 16 17  2  0      
 17 18  1  0      
 18 19  2  0      
 19 14  1  0      
 17 20  1  0      
 20 21  2  0      
 21 22  1  0      
 22 23  2  0      
 23 24  1  0      
 24 25  2  0      
 25 20  1  0      
 21 26  1  0      
 14 35  1  0      
 15 37  1  0      
 24 39  1  0      
 23 41  1  0      
 27 28  1  0      
 29 30  1  0      
 31 32  1  0      
 33 34  1  0      
 35 36  1  0      
 37 38  1  0      
 39 40  1  0      
 41 42  1  0      
M  END
